# Supplementary material for: Clinical outcome of HIV/AIDS patients with Mycobacterium spp. disease associated with Cytomegalovirus viremia: a retrospective study.
Source: Research Square preprint supplement (doi:10.21203/rs.3.rs-6405843/v1), 2025-05-06
Supplement: Supplementary file 2 [file d7ffd4117a29fa0a5cf790fe.xlsx]

## Sheet: Data Base
num	record	gender	age	bmi	previous_art	sexual_pref	alcohol_comp	tabaquism	drugs	dm	sofa	apache	hepathopathy	fever	dispnoea	cough	headache	diarrhea	weight_loss_10kg	glasgow	adenopathies	hepatomeg	esplenomeg	severe_sepsis	shock	severe_resp_insf	mods	multiple_od	candida	cocci	crypto	criptospor	hiv_encefalop	herpes_simplex	histo	isos	ks	pcp	pml	salmonella	toxo	anal_cancer	hbv	hcv	leu	neu	lin	hb	hto
1	212855	1	25	21	1	2	1	1	0	0	2	8	0	1	1	1	0	0	0	15	1	0	0	1	0	0	0	1	1	0	0	0	0	0	0	0	0	1	0	0	0	0	0	0	19000	18400	600	6.67	22
2	216549	1	47	15	1	2	1	0	0	0	2	15	0	1	0	0	0	1	1	15	0	1	1	0	0	0	0	0	0	0	0	0	0	0	0	0	0	0	0	0	0	0	0	0	7100	7000	100	11.76	38.8
3	220988	1	57	20	0	1	0	0	0	0	1	8	0	1	1	1	1	0	1	15	0	1	0	0	0	0	0	1	1	0	0	0	0	0	0	0	0	0	0	0	0	0	0	0	5500	4600	900	9.7	32
4	223911	0	59	21	0	1	0	0	0	0	2	9	0	1	1	1	0	0	1	15	0	0	0	0	0	0	0	0	0	0	0	0	0	0	0	0	0	0	0	0	0	0	0	0	7100	5700	1400	12.73	42
5	221303	1	26	22	0	3	0	0	0	0	4	10	0	1	1	1	1	1	1									1	0	0	0	0	0	0	1	0	0	0	0	0	0	0	0	0	9100	8100	1000	7.36	24.3
6	221379	1	40	18	1	2	0	0	0	0	2	9	0	1	0	0	0	1	1	15	0	0	0	1	0	0	0	1	0	0	0	0	0	0	1	0	0	1	0	0	0	0	0	0	3400	1100	2300	10.61	35
7	221176	1	40	22	0	3	0	0	0	1	3	13	0	1	1	1	0	0	1	15	1	0	0	0	0	0	0	1	0	0	0	0	0	0	1	0	0	0	0	0	0	0	0	0	13600	10700	2900	7.39	24.4
8	224509	0	45	21	1	1	0	0	0	0	1	13	0	1	1	0	0	0	1	15	1	1	0	1	1	1	1	1	1	0	0	0	0	0	0	0	0	0	0	0	0	0	0	0	13600	11100	2500	9.06	29.9
9	198268	1	29	23	1	1	0	0	0	0	3	8	0	1	1	1	1	0	1	15	1	0	0	0	0	0	0	1	0	0	0	0	0	0	0	0	0	0	1	0	0	0	0	0	8000	6100	1900	11.52	38
10	203605	1	35	20	1	3	1	1	0	0	2	12	0	1	1	1	0	1	1	15	1	1	1	0	0	0	0	0	0	0	0	0	0	0	0	0	0	0	0	0	0	0	0	0	8900	7800	1100	9.06	29.9
11	226389	1	23	19	0	2	1	1	0	0	3	8	0	1	1	1	0	1	1	15	1	1	0	0	0	0	0	1	0	0	0	0	0	0	0	0	0	0	0	0	0	0	0	0	5700	4100	1600	12.97	42.8
12	209700	1	49	23	0	3	1	1	1	0	2	10	0	1	0	1	0	0	0	15	0	0	0	0	0	0	0	1	1	0	0	0	0	0	0	0	0	1	0	0	0	0	0	0	4200	3000	1200	10.52	34.7
13	227242	0	37	28	0	1	0	1	0	0	2	6	0	1	1	1	1	0	0	15	0	0	0	0	0	0	0	1	1	0	0	0	0	0	0	0	0	0	0	0	0	0	0	0	3700	3300	400	9.73	32.1
14	227597	1	47	18	0	3	1	1	0	0	5	14	0	1	1	1	1	0	1	13	0	0	0	0	0	0	0	1	1	0	0	0	0	0	0	0	0	0	0	0	0	0	0	0	6000	5700	300	9.3	30.7
15	226289	1	26	16	0	2	1	1	0	0	2	12	0	1	1	1	0	0	1	15	0	0	0	0	0	0	0	0	0	0	0	0	0	0	0	0	0	0	0	0	0	0	0	0	10500	9500	1000	10.91	36
16	202657	1	31	14	0	3	1	1	1	0	2	11	0	1	1	1	0	1	1	15	0	0	0	0	0	0	0	1	1	0	0	0	0	0	0	0	0	0	0	0	0	0	1	0	6000	5600	400	8.39	27.7
17	210843	1	27	21	0	1	0	0	0	0	2	14	0	1	1	1	1	1	1	15	1	1	1	1	0	0	0	1	0	0	0	0	0	0	1	0	0	1	0	0	0	0	0	0	8300	6500	1800	7.36	24.3
18	227742	0	37	22	1	1	1	1	1	0	3	7	0	1	1	1	0	0	0	15	0	0	0	0	0	0	0	0	0	0	0	0	0	0	0	0	0	0	0	0	0	0	0	0	8400	7600	800	10.27	33.9
19	227875	1	26	26	1	1	1	1	1	0	1	7	0	1	0	1	0	0	0	15	0	0	0	0	0	0	0	0	0	0	0	0	0	0	0	0	0	0	0	0	0	0	0	0	5700	3900	1800	10.94	36.1
20	203270	1	32	18	0	1	1	1	0	0	5	15	0	1	1	1	0	0	1	15	0	0	0	0	0	0	0	1	0	0	0	0	0	0	0	0	0	1	0	0	0	0	0	0	8200	7500	700	6.52	21.5
21	203201	1	31	17	0	2	1	1	0	0	3	6	0	1	1	1	0	1	1	15	0	1	1	1	0	0	0	0	0	0	0	0	0	0	0	0	0	0	0	0	0	0	0	0	4100	3000	1100	9.09	30
22	228217	0	24	15	0	1	0	0	0	0	4	6	1	1	1	1	1	1	1	15	0	1	1	1	1	1	1	1	1	0	0	0	0	0	0	0	0	1	0	0	0	0	0	0	16000	14800	1200	11.82	39
23	202861	1	23	21	0	1	1	1	0	0	1	7	0	1	1	1	1	1	1	15	0	0	0	0	0	0	0	0	0	0	0	0	0	0	0	0	0	0	0	0	0	0	0	0	3700	2100	1600	9.45	31.2
24	228908	1	32	22	0	3	1	1	0	0	5	17	0	1	1	1	0	0	0	15	1	0	0	0	0	0	0	1	1	0	0	0	0	0	0	0	1	0	0	0	0	0	0	0	2900	1900	1000	5.36	17.7
25	220989	0	36	19	1	3	0	0	0	0	3	14	0	1	0	0	1	1	1	15	0	0	0	0	0	0	0	1	1	0	0	0	0	0	1	0	0	0	0	0	0	0	0	0	8700	8200	500	8.45	27.9
26	207568	1	40	22	0	1	1	1	1	0	2	14	0	1	0	0	1	1	1	12	1	1	0	0	0	0	0	1	0	0	0	0	1	0	0	0	0	0	0	0	0	0	0	0	4600	3240	1360	8.7	28.7
27	229363	1	32	12	0	2	0	1	0	0	4	13	0	1	1	1	1	0	1	13	0	0	0	1	0	0	0	1	1	0	0	0	0	1	0	0	1	1	0	0	0	0	0	0	14900	14000	900	8.27	27.3
28	230702	0	41	16	0	1	0	0	0	0	4	14	0	1	1	1	0	1	1	15	1	1	0	0	0	0	0	1	1	0	0	0	0	0	0	0	0	1	0	0	0	0	0	0	4800	4000	800	5.64	18.6
29	230382	1	38	13	1	2	0	0	0	0	4	7	0	1	1	1	1	0	1	13	0	1	1	1	0	0	0	0	0	0	0	0	0	0	0	0	0	0	0	0	0	0	0	0	3400	2900	500	10.42	34.4
30	231657	1	26	22	0	1	1	1	1	0	4	10	0	1	1	1	1	0	1	14	0	0	0	0	0	0	0	1	0	0	0	0	1	0	0	0	0	0	0	0	0	0	0	0	5200	4400	800	9.39	31
31	199134	1	62	17	1	1	0	0	0	0	3	11	0	1	1	1	1	0	1	15	0	0	0	1	1	1	1	0	0	0	0	0	0	0	0	0	0	0	0	0	0	0	0	0	12400	9680	2720	12.12	40
32	231088	1	31	14	0	3	0	1	0	0	1	6	0	1	0	1	0	1	1	15	1	1	0	0	0	0	0	1	0	0	0	0	0	0	0	0	1	0	0	0	0	0	0	0	6300	5790	510	11.42	37.7
33	231090	1	30	17	0	3	0	1	0	0	2	9	0	1	0	0	0	0	1	15	0	0	0	0	0	0	0	0	0	0	0	0	0	0	0	0	0	0	0	0	0	0	0	0	6700	5300	1400	11.76	38.8
34	146119	1	42	21	1	3	1	1	0	0	2	12	0	1	0	0	0	1	1	15	0	1	1	1	0	0	0	1	1	0	0	0	0	0	0	0	1	1	0	0	0	0	0	0	10400	8900	1500	7.27	24
35	232078	1	24	20	0	2	0	0	0	0	0	10	0	1	0	1	1	0	1	15	0	1	0	0	0	0	0	1	1	0	0	0	0	0	0	0	1	0	0	0	0	0	0	0	4100	3400	700	8.33	27.5
36	222433	1	36	16	0	3	1	1	0	0	2	10	0	1	0	0	1	1	1	15	1	1	0	0	0	0	1	1	0	0	0	0	0	0	0	0	0	0	0	0	0	0	0	0	3700	3000	700	5.91	19.5
37	230657	1	23	20	0	2	0	0	0	0	4	17	0	1	0	1	0	1	1	15	1	1	0	0	0	0	0	0	0	0	0	0	0	0	0	0	0	0	0	0	0	0	0	0	5800	3900	1900	8.64	28.5
38	209215	2	39	21	1	3	0	0	0	0	4	13	0	1	1	1	1	1	1	15	0	1	0	1	0	0	1	1	0	0	0	0	0	0	0	0	0	0	0	1	0	0	0	0	2500	1800	700	6.79	22.4
39	220250	1	22	20	0	1	0	0	0	0	3	7	0	1	1	1	1	0	1	14	0	0	0	0	0	0	0	1	0	1	0	0	1	0	0	0	0	0	0	0	0	0	0	0	6400	4600	1800	12.06	39.8
40	221431	1	38	22	0	2	1	1	0	0	2	7	0	1	0	1	0	0	1					1	1	1		0	0	0	0	0	0	0	0	0	0	0	0	0	0	0	0	0	4300	3500	800	10.39	34.3
41	209655	0	39	23	0	1	1	1	0	0	2	13	0	1	1	1	1	0	1	11	1	1	1	1	0	0	0	0	0	0	0	0	0	0	0	0	0	0	0	0	0	0	0	0	3800	3600	200	8.09	26.7
42	224896	1	40	14	0	3	0	1	0	0	2	11	0	1	0	1	1	1	1	15	0	1	1	0	0	0	0	1	0	0	0	0	0	0	0	0	0	1	0	0	0	0	0	0	8600	7800	800	8.42	27.8
43	206917	1	25	17	0	2	1	1	0	0	2	8	0	1	0	0	0	1	1	15	1	0	0	0	0	0	0	1	0	0	0	0	0	0	0	0	0	1	0	0	0	1	0	0	9900	7400	2500	10.48	34.6
44	208860	1	23	16.9	0	2	1	1	0	0	2	9	0	1	1	1	0	0	1	15	0	0	0	0	0	1	0	1	0	0	0	0	0	0	0	0	0	1	0	0	0	0	0	0	8000	7190	810	12.64	41.7
45	196255	1	19	17	0	2	0	1	1	0	1	10	1	1	1	1	0	0	1	15	0	0	0	0	0	0	0	1	0	0	0	0	0	0	0	0	0	0	0	0	0	0	0	1	3600	3100	500	8.24	27.2
46	215640	1	42	21	0	1	0	0	0	0	2	11	0	1	1	1	1	0	1	15	0	0	0	0	0	0	0	0	0	0	0	0	0	0	0	0	0	0	0	0	0	0	0	0	5800	5300	500	9.15	30.2
47	214363	1	23	21	1	1	0	0	0	0	1	8	0	1	1	1	0	0	1	15	0	1	1	1	1	1	1	1	1	0	0	0	0	0	0	0	0	0	0	0	0	0	0	0	7800	6300	1500	9.21	30.4
48	221791	0	24	15	1	1	0	1	1	0	2	8	0	1	1	1	0	1	1	15	1	1	1	1	0	0	1	1	0	0	0	0	0	0	1	0	0	0	0	0	0	0	0	0	6000	5500	500	8.27	27.3
49	221791	0	24	15	1	1	1	1	1	0	3	12	0	1	1	1	1	1	1	15	1	0	0	0	0	0	1	1	0	0	0	0	0	0	1	0	0	0	0	0	0	0	0	0	6000	5500	500	8.27	27.3
50	221938	2	38	20	0	3	1	1	1	0	1	8	0	1	1	1	0	1	1	15	0	0	0	0	0	0	0	0	0	0	0	0	0	0	0	0	0	0	0	0	0	0	0	0	2300	1700	600	10.61	35
51	231405	1	31	18	1	2	0	0	0	0	3	10	0	1	0	1	0	1	1	15	0	0	0	0	0	0	0	0	0	0	0	0	0	0	0	0	0	0	0	0	0	0	0	0	8200	7600	600	8.27	27.3
52	217763	1	28	26.7	0	3	0	0	0	0	3	7	0	1	1	1	0	1	1	15	1	1	0	0	0	0	0	0	0	0	0	0	0	0	0	0	0	0	0	0	0	0	0	0	6800	6500	300	11.48	37.9
53	226477	2	33	23	0	3	1	1	1	0	4	10	0	1	1	1	1	0	0	13	0	0	0	0	0	0	0	0	0	0	0	0	0	0	0	0	0	0	0	0	0	0	0	0	3400	2500	900	8	26.4
54	218514	1	46	24	1	2	0	0	0	0	2	11	0	1	1	1	1	0	1	15	0	0	0	0	0	0	0	1	0	0	0	0	0	0	0	0	0	0	0	0	0	0	0	0	13900	11300	2600	8.76	28.9
55	220341	1	33	19	1	2	0	0	0	0	3	10	0	1	0	0	1	1	1	15	1	0	0	0	0	0	0	0	0	0	0	0	0	0	0	0	0	0	0	0	1	0	0	0	8700	7130	1570	11.64	38.4
56	221434	1	33	18	1	3	0	0	0	0	7	18	0	1	1	1	0	0	1	15	1	0	0	0	0	0	0	1	0	0	0	0	0	0	1	0	0	0	0	0	0	0	0	0	13600	13300	300	8.21	27.1
57	200163	1	39	19	1	3	1	1	0	0	5	10	0	1	1	1	0	0	1	15	0	0	0	0	0	0	0	1	0	0	0	0	0	0	0	0	0	1	0	0	0	0	0	1	5200	4000	1200	14.7	48.5
58	220250	1	24	20	0	1	0	0	0	0	2	12	0	1	1	1	1	0	1	15	0	1	0	0	0	0	0	1	0	1	0	0	0	0	0	0	0	0	0	0	0	0	0	0	6400	4600	1800	12.06	39.8
59	226287	1	43	15	0	2	0	1	0	0	3	15	0	1	1	1	0	1	1	15	1	0	0	1	1	1	1	1	0	0	1	0	0	0	0	0	0	0	0	0	0	0	0	0	1500	1300	200	6.36	21
60	162967	1	42	25	1	2	0	0	0	0	2	10	0	1	1	1	1	1	1	15	1	0	0	0	0	0	0	1	0	0	0	1	0	0	0	0	0	0	0	0	0	0	0	0	4000	2500	1500	10	33
61	203779	1	32	19	1	2	0	0	0	0	5	7	0	1	1	1	1	0	1	15	0	0	0	0	0	0	0	1	0	0	0	1	0	0	0	0	0	0	0	0	0	0	0	0	8500	7200	1300	9.18	30.3
62	215870	1	24	13	0	3	0	0	0	0	2	10	0	1	1	1	0	0	1	15	1	1	0	0	0	0	0	0	0	0	0	0	0	0	0	0	1	0	0	0	0	0	0	0	3000	2600	400	8.18	27
63	192613	1	47	23	0	3	0	0	0	0	3	9	0	1	1	1	0	0	1	15	1	0	1	0	0	0	0	1	1	0	0	0	0	0	0	0	1	0	0	0	0	0	0	0	4100	3900	200	7.55	24.9
64	190650	1	39	18	0	3	0	0	0	0	5	11	0	1	0	1	0	1	1	15	0	1	0	1	0	0	0	1	1	0	0	0	0	0	0	0	1	1	0	0	0	0	0	0	16800	14800	2000	11.82	39
65	196709	1	44	22	0	3	0	0	0	0	5	21	0	1	1	1	1	0	1	15	0	0	0	0	0	0	0	1	1	0	0	0	0	0	0	0	0	0	0	0	0	0	0	0	8000	6820	1180	8.48	28
66	221542	1	36	22	0	3	1	1	0	0	3	10	0	1	1	1	0	0	1	15	1	0	0	0	0	0	0	1	0	0	0	0	0	0	0	0	0	1	0	0	0	0	0	0	2200	1200	1000	9.36	30.9
67	214922	0	23	16	0	3	1	1	1	0	3	9	0	1	1	1	1	1	1	15	1	1	0	0	0	0	0	1	1	0	0	0	0	0	0	0	0	0	0	0	0	0	0	0	6240	4830	1410	10.39	34.3
68	229273	1	61	15	0	3	1	0	0	0	1	9	0	1	0	0	0	1	1	15	0	0	0	0	0	0	0	1	1	0	0	0	0	0	0	0	0	0	0	0	0	0	0	0	7500	6400	1100	9.88	32.6
69	213693	1	31	18	0	3	0	1	0	0	1	5	0	1	1	1	0	0	1	15	0	1	0	0	0	0	0	0	0	0	0	0	0	0	0	0	0	0	0	0	0	0	0	0	10700	6840	3860	11.3	37.3
70	213412	1	31	28	0	3	1	1	0	0	3	5	0	1	1	1	1	0	0	15	0	0	0	0	0	0	0	0	0	0	0	0	0	0	0	0	0	0	0	0	0	0	0	0	5600	3740	1860	13.88	45.8
71	214068	1	39	18	1	3	0	0	0	0	1	5	0	1	1	1	0	1	1	15	1	1	0	0	0	0	0	0	0	0	0	0	0	0	0	0	0	0	0	0	0	0	0	0	5700	4200	1500	11.12	36.7
72	213787	1	45	23	0	3	0	0	1	0	2	12	0	1	1	1	0	0	0	15	0	0	0	0	0	0	0	1	0	0	0	0	0	0	0	0	0	0	0	0	0	0	0	0	11600	9200	2400	14.52	47.9
73	213413	1	27	16	0	3	1	1	0	0	3	10	0	1	1	1	0	0	1	15	1	1	1	1	0	0	0	1	0	0	0	0	0	0	1	0	0	0	0	0	0	0	0	0	7900	7100	800	9.94	32.8
74	225391	1	35	24	0	2	0	0	1	0	3	7	0	1	1	1	1	0	0	15	0	0	0	1	0	0	0	1	0	0	1	0	0	0	0	0	0	1	0	0	0	0	0	0	8800	7100	1700	12.06	39.8
75	211161	1	22	22	0	2	1	1	0	0	1	9	0	1	1	1	0	0	0	15	1	1	0	0	0	0	0	1	1	0	0	0	0	0	0	0	0	1	0	0	0	0	0	0	6000	5100	900	9.12	30.1
76	210161	1	39	25	1	3	1	1	1	0	3	9	1	1	0	0	0	0	1	15	0	1	1	0	0	0	0	0	0	0	0	0	0	0	0	0	0	0	0	0	0	0	0	0	5600	3900	1700	7.58	25
77	209383	1	44	18	1	3	1	0	0	0	2	9	0	1	1	0	0	1	1	15	1	0	0	1	0	0	0	0	0	0	0	0	0	0	0	0	0	0	0	0	0	0	0	0	6700	5900	800	7.03	23.2
78	232546	1	29	16	0	2	0	0	0	0	1	10	0	1	0	1	0	0	1	15	0	0	0	0	0	1	0	1	0	0	0	0	0	0	1	0	0	0	0	0	0	0	0	1	6700	4700	2000	10.18	33.6
79	207175	1	36	13	0	3	0	0	0	0	3	10	0	1	1	1	1	1	1	15	0	1	0	1	1	1	0	1	1	0	0	0	0	0	0	0	0	0	0	0	0	0	0	0	2500	2400	100	7.82	25.8
80	212839	1	24	20	0	2	1	0	0	0	1	7	0	1	1	1	0	0	1	15	0	0	0	0	0	0	0	1	1	0	0	0	0	0	0	0	0	1	0	0	0	0	0	0	2800	1060	1740	11	36.3
81	203546	1	21	18	1	2	1	1	1	0	3	12	0	1	1	1	1	0	1	15	1	1	0	0	0	0	0	1	1	0	0	0	0	0	0	0	1	1	0	0	0	0	0	0	4000	3200	800	7.39	24.4
82	226556	0	28	14	1	1	0	0	0	0	3	9	0	1	0	0	1	1	1	15	0	1	1	1	0	0	0	0	0	0	0	0	0	0	0	0	0	0	0	0	0	0	0	0	14400	13800	600	8.79	29
83	205650	1	49	22.5	0	3	1	0	0	0	1	10	0	1	1	1	0	1	1	15	0	0	0	0	0	0	0	0	0	0	0	0	0	0	0	0	0	0	0	0	0	0	0	0	4300	2600	1700	12.36	40.8
84	205116	1	30	18	0	3	1	0	0	0	3	12	0	1	1	1	1	1	1	15	1	1	1	0	0	0	0	1	0	0	0	0	1	0	0	0	0	0	0	0	0	0	0	0	5000	4800	200	7	23.1
85	221077	1	39	18	1	2	0	0	0	1	5	19	0		1	0	0	0	0									1	1	0	0	0	0	0	0	0	0	0	0	0	0	0	0	0	6300	4300	2000	8.03	26.5
86	214956	1	38	24	0	2	0	1	0	0	3	11	0	1	1	1	1	1	1	15	0	0	0	0	0	0	0	1	0	0	0	0	0	0	0	0	0	0	0	0	0	0	0	0	5400	4200	1200	6.7	22.1
87	190318	0	34	23	1	2	0	0	0	0	3	6	0	1	1	1	0	0	0	15	0	0	0	0	0	0	0	0	0	0	0	0	0	0	0	0	0	0	0	0	0	0	0	0	8700	7000	1700	11.61	38.3
88	224093	1	59	19	0	1	1	1	1	0	2	11	0	1	1	1	0	0	1	15	0	1	0	0	0	1	0	0	0	0	0	0	0	0	0	0	0	0	0	0	0	0	0	0	4300	2300	2000	12.21	40.3
89	220401	0	33	18	0	1	0	0	0	0	1	8	0	1	1	1	0	0	1	15	0	0	0	0	0	0	0	1	1	0	0	0	0	0	0	0	0	0	0	0	0	1	0	0	7000	6000	1000	8.79	29
90	191460	1	55	21	1	1	1	1	0	0	3	12	0	1	1	1	1	0	1	15	0	0	0	0	0	0	0	0	0	0	0	0	0	0	0	0	0	0	0	0	0	0	0	0	6700	3700	3000	11.76	38.8
91	228758	0	24	16	0	2	0	0	0	0	3	9	0	1	1	1	0	1	1	15	0	1	0	0	0	0	0	1	0	0	0	0	0	0	0	0	0	0	0	0	0	0	0	0	5000	3700	1300	11.36	37.5
92	211562	1	41	21	1	1	1	1	0	0	1	11	0	1	1	1	0	0	1	15	0	0	0	0	0	0	0	0	0	0	0	0	0	0	0	0	0	0	0	0	0	0	0	0	8000	6700	1300	9.67	31.9
93	208414	1	25	21.7	0	1	1	1	1	0	1	8	0	1	0	1	0	1	1	15	1	0	0	0	0	0	0	0	0	0	0	0	0	0	0	0	0	0	0	0	0	0	0	0	5300	4500	800	12.64	41.7
94	222899	1	33	20	0	2	1	1	1	0	3	11	0	1	1	1	1	0	1	12	0	1	0	0	0	0	0	0	0	0	0	0	0	0	0	0	0	0	0	0	0	0	0	0	3100	2700	400	11.15	36.8
95	204324	1	35	23	0	2	1	1	1	0	2	7	0	1	1	1	0	0	0	15	1	1	0	1	1	1	0	1	1	0	0	0	0	0	0	0	0	1	0	0	0	1	0	0	7300	6000	1300	9.61	31.7
96	182056	1	32	18	1	2	1	0	1	0	2	10	0	1	1	1	0	1	1	15	0	1	0	1	1	1	0	1	1	0	0	0	0	0	0	0	0	1	0	0	0	0	0	0	5900	5100	800	7.12	23.5
97	197795	1	24	17	0	1	1	1	1	0	3	11	0	1	1	1	0	0	1	13	0	1	1	1	1	1	1	1	1	0	0	0	0	0	0	0	0	1	0	0	0	0	0	0	9500	7900	1600	10.39	34.3
98	196523	1	39	25	1	3	1	1	0	0	3	8	0	1	1	1	0	0	1	15	0	0	0	0	0	0	0	1	0	0	0	0	0	0	0	0	0	1	0	0	0	0	0	0	9200	8500	700	11.67	38.5
99	222811	1	45	18	0	2	0	0	0	0	1	8	0	1	1	1	0	0	1	15	0	0	0	0	0	0	0	0	0	0	0	0	0	0	0	0	0	0	0	0	0	0	0	0	6900	3800	3100	10.42	34.4
100	221193	1	43	20	0	3	0	0	0	0	3	8	0	1	1	1	0	1	1	15	1	1	0	0	0	0	0	1	1	0	0	0	0	0	0	0	1	1	0	0	0	0	1	0	5400	4100	1300	7	23.1
101	216647	1	28	16	0	3	0	0	0	0	1	10	0	1	1	0	0	1	1	15	0	1	1	1	0	0	0	1	1	0	0	0	0	0	0	0	0	1	0	0	0	0	0	0	2400	1100	1300	7.67	25.3
102	223990	1	44	15	1	3	1	1	0	0	1	8	0	1	1	1	0	1	1	15	1	0	0	0	0	0	0	1	0	0	0	0	0	0	0	0	0	1	0	0	0	0	0	0	3600	3000	600	8.94	29.5
103	219942	1	24	15	0	3	0	0	0	0	1	10	0	1	1	0	0	1	1	15	0	1	1	1	0	0	1	1	1	0	0	0	0	0	0	0	0	0	0	0	0	0	0	0	1600	500	1100	8.48	28
104	220561	1	25	17	0	3	0	0	0	0	4	10	0	1	1	1	0	0	1	15	0	0	0	0	0	1	0	0	0	0	0	0	0	0	0	0	0	0	0	0	0	0	0	0	5900	5400	500	8	26.4
105	217992	1	27	15.9	0	3	0	0	0	0	3	11	0	1	0	1	0	0	1	15	0	0	0	0	0	0	0	0	0	0	0	0	0	0	0	0	0	0	0	0	0	0	0	0	9100	7100	2000	11.52	38
106	230317	1	56	17	0	3	0	0	0	0	1	15	0	1	1	1	0	1	1	15	0	0	0	0	0	0	0	1	0	0	0	0	0	0	0	0	0	0	0	0	0	0	0	0	1800	1600	200	6.67	22
107	201134	1	29	22	0	3	1	1	1	0	1	6	0	1	1	1	0	0	1	15	1	0	0	0	0	0	0	1	1	0	0	0	0	0	0	0	0	0	0	0	0	1	0	0	7800	6700	1100	9.79	32.3
108	214013	1	36	20	0	3	0	0	0	0	4	10	0	1	1	1	1	1	1	15	0	0	0	0	0	0	0	0	0	0	0	0	0	0	0	0	0	0	0	0	0	0	0	0	6800	5600	1200	9.39	31
109	206911	1	24	15	0	1	1	1	1	0	1	8	0	1	1	1	0	1	1	15	1	1	1	0	0	0	0	1	0	0	0	0	0	0	0	0	0	0	0	0	0	0	0	0	15400	14010	1390	8.85	29.2
110	232913	1	42	27	1	1	0	1	0	0	4	9	0	1	1	1	0	1	1	15	0	0	0	1	1	1	1	0	0	0	0	0	0	0	0	0	0	0	0	0	0	0	0	0	11800	11100	700	9.36	30.9
111	218040	1	48	17	1	2	0	0	0	0	1	10	0	1	0	0	0	1	1	15	0	1	1	0	0	0	0	1	0	0	0	0	0	0	1	0	0	1	0	0	0	0	1	1	900	600	300	9.18	30.3
112	215870	1	24	13.4	0	2	0	0	0	0	2	8	0	1	1	1	0	0	1	15	1	0	0	0	0	0	0	0	0	0	0	0	0	0	0	0	1	0	0	0	0	0	0	0	8600	7890	710	8.55	28.2
113	216684	1	37	18	0	3	0	0	0	0	3	13	0	1	0	0	0	1	1	12	0	0	0	1	1	1	1	1	1	0	0	0	0	0	0	0	0	0	0	0	0	0	0	0	1300	800	500	6.97	23
114	223204	1	35	17	0	3	0	0	0	0	2	8	0	1	1	1	0	1	1	15	0	1	0	0	0	0	0	1	1	0	0	0	0	0	0	0	1	0	0	0	0	0	0	0	2200	1800	400	6.18	20.4
115	219903	1	44	16	1	2	0	0	0	0	5	14	0	1	1	1	1	0	1	10	1	1	1	1	0	1	1	0	1	0	0	0	0	0	0	0	0	1	0	0	0	0	0	0	7400	6800	600	6.85	22.6
116	219475	0	33	27	0	2	0	0	0	0	2	10	0	0	0	0	0	0	1	15	1	1	1	0	0	0	0	1	1	0	0	0	0	0	0	0	0	0	0	0	0	0	0	0	5040	4000	1040	8.79	29
117	220561	1	27	19	1	2	0	0	0	0	2	10	0	1	1	1	1	0	1	15	1	1	1	1	1	1	1	1	0	0	0	0	0	0	0	0	0	1	0	0	0	0	0	0	4050	3900	150	8.18	27
118	179763	1	39	16	1	2	0	1	1	0	4	13	1	1	1	1	1	1	1	13	1	1	0	1	1	0	0	1	1	0	0	1	0	0	0	0	0	1	0	1	0	0	0	0	6900	6300	600	5.33	17.6
119	228150	0	36	15	0	2	0	0	0	0	2	7	0	1	1	1	0	1	1	15	0	1	1	1	0	0	0	1	1	0	0	0	0	0	0	0	0	0	0	0	0	0	0	0	4300	3400	900	9.06	29.9
120	231678	1	34	20	0	3	1	0	0	0	1	7	0	1	1	1	1	0	0	15	0	1	0	0	0	0	0	1	0	0	0	0	1	0	0	0	0	0	0	0	0	0	0	0	5500	4500	1000	11.33	37.4
121	182939	0	55	22	1	2	0	0	0	0	4	15	0	1	1	1	0	0	1	15	0	0	0	0	0	0	0	0	0	0	0	0	0	0	0	0	0	0	0	0	0	0	0	0	6700	5100	1600	11.79	38.9
122	190499	1	39	23	1	2	1	1	1	0	2	5	0	1	0	0	1	0	0	15	0	0	0	0	0	0	0	0	0	0	0	0	0	0	0	0	0	0	0	0	0	0	0	0	5900	3000	2900	11.09	36.6
123	205723	1	29	20	0	3	1	1	1	0	2	9	0	1	1	1	1	1	1	15	1	1	0	1	1	1	1	1	0	1	0	0	0	0	0	0	0	0	0	0	0	0	0	0	11100	10710	390	8.03	26.5
124	227253	1	36	17	0	2	0	0	0	0	5	13	0	1	1	1	0	1	1	15	0	0	0	0	0	0	0	1	0	0	0	0	0	0	0	0	0	1	0	0	0	0	0	0	4800	4400	400	5.45	18
125	210251	1	29	17	1	2	1	1	0	0	0	9	0	1	1	1	0	0	1	15	1	1	0	1	0	0	0	1	0	0	0	0	0	0	0	0	0	1	0	0	0	0	0	0	3200	2800	400	6.82	22.5
126	212347	0	33	22	0	3	0	0	0	0	5	14	0	1	1	1	1	0	0	13	0	0	0	0	0	0	0	0	0	0	0	0	0	0	0	0	0	0	0	0	0	0	0	0	6600	6100	500	7.3	24.1
127	197628	1	42	15	0	2	0	0	0	0	1	10	0	1	1	1	1	1	1	15	1	0	0	0	0	0	0	1	0	0	0	0	0	0	0	0	0	1	0	0	0	0	0	0	2600	2000	600	7.33	24.2
128	228020	1	43	18	0	2	0	1	0	0	2	6	0	1	1	1	0	0	0	15	0	0	0	0	0	0	0	0	0	0	0	0	0	0	0	0	0	0	0	0	0	0	0	0	4400	3500	900	12.09	39.9
129	225167	0	37	14	0	1	0	0	0	0	1	8	0	1	1	1	0	1	1	15	0	1	1	1	1	0	1	1	1	0	0	0	0	0	0	0	0	1	0	0	0	0	0	0	3100	2900	200	7.76	25.6
130	229208	1	37	15	1	3	1	1	1	0	2	5	0	1	0	0	0	0	1	15	0	0	0	0	0	0	0	0	0	0	0	0	0	0	0	0	0	0	0	0	0	0	0	0	5200	5100	100	11.42	37.7
131	195682	1	32	21	0	2	0	0	0	0	5	13	0	0	0	0	1	1	1	15	0	0	0	0	0	0	0	1	1	0	0	0	0	0	0	0	0	0	0	0	0	0	0	0	18600	15500	3100	10.33	34.1
132	202017	1	28	21	1	1	1	1	0	0	1	5	1	1	0	0	0	1	1	15	0	1	1	0	0	0	0	1	1	0	0	0	0	0	0	0	0	0	0	0	0	0	0	0	7100	6500	600	9.3	30.7
133	225953	1	28	19	0	2	1	1	0	0	3	12	0	1	1	1	0	1	1	15	1	0	0	1	0	0	0	1	1	0	0	0	0	0	0	0	0	1	0	0	0	0	0	0	8900	8500	400	8.18	27
134	219053	1	26	16	1	2	0	0	0	0	1	9	0	1	1	1	1	0	1	15	0	0	0	0	0	0	0	1	1	0	0	0	0	0	0	0	1	0	0	0	0	0	0	0	2000	1200	800	10.79	35.6
135	157956	1	34	22	1	1	0	0	0	0	1	8	0	1	1	1	1	0	1	15	1	0	0	1	1	1	1	1	0	1	0	0	0	0	0	0	0	0	0	0	0	0	0	0	13800	11400	2400	10.85	35.8
136	213868	1	31	20	0	2	1	1	0	0	2	7	0	1	0	0	0	0	1	15	1	0	0	0	0	0	0	0	0	0	0	0	0	0	0	0	0	0	0	0	0	0	0	0	7300	5800	1500	10.91	36
137	215334	1	34	21	1	2	1	1	1	0	2	12	0	1	1	1	1	0	1	15	0	0	0	0	0	0	0	1	0	0	0	0	0	0	0	0	0	1	0	0	0	0	0	0	13600	11670	1930	7.85	25.9
138	222900	1	53	17	0	1	1	11	1	0	4	8	1	1	1	1	0	1	1	15	0	1	1	0	0	0	0	1	1	0	0	0	0	0	0	0	0	1	0	0	0	0	1	0	2600	1500	1100	9.09	30
139	222825	1	52	19	1	2	0	1	0	0	2	8	0	1	1	1	0	0	0	15	1	0	0	0	0	0	0	1	0	0	1	0	0	0	0	0	0	0	0	0	0	0	0	0	5400	3400	2000	11.42	37.7
140	222293	1	28	21	0	1	1	1	1	0	1	10	0	1	1	1	0	1	1	15	1	0	0	0	0	0	0	0	0	0	0	0	0	0	0	0	0	0	0	0	0	0	0	0	9000	7100	1900	11.94	39.4
141	195070	1	44	22	1	2	0	0	0	0	3	8	0	0	0	1	0	1	1	15	1	0	0	0	0	0	0	1	1	0	0	0	0	0	0	0	1	0	0	0	0	0	0	0	5800	5200	600	7.88	26
142	222719	1	23	15	0	2	0	0	0	0	1	6	0	1	0	1	0	0	1	15	1	0	0	1	0	1	0	1	0	0	0	0	0	0	0	0	1	0	0	0	0	0	0	0	3200	2900	300	9.48	31.3
143	168920	1	33	18	1	1	1	1	1	0	0	7	0	1	1	1	1	1	1	15	0	1	1	0	0	0	0	1	1	0	0	0	0	0	0	0	0	1	0	1	0	0	0	0	2700	2060	640	11.55	38.1
144	208957	1	64	23	0	1	0	0	0	0	2	14	0	1	0	1	1	0	1	12	0	0	0	0	0	1	0	0	0	0	0	0	0	0	0	0	0	0	0	0	0	0	0	0	7100	6100	1000	9.3	30.7
145	222350	1	38	23	0	2	0	0	0	0	3	7	0	1	1	1	1	0	1	13	0	0	0	0	0	0	0	0	0	0	0	0	0	0	0	0	0	0	0	0	0	0	0	0	5000	3000	2000	11.76	38.8
146	205944	1	33	16	1	3	0	0	0	0	4	8	0	1	0	0	1	1	1	15	1	1	1	1	0	0	0	1	0	0	0	0	0	0	0	0	1	0	0	0	0	1	0	0	1800	1400	400	8.27	27.3
147	210063	1	34	17	1	3	0	1	1	0	2	9	0	1	1	1	0	0	1	15	0	0	0	0	0	0	0	1	1	0	0	0	0	0	0	0	0	1	0	0	0	0	0	0	7500	6900	600	8.82	29.1
148	210538	1	30	17	0	1	1	0	0	0	6	17	0	1	0	1	1	0	1	12	0	0	1	0	0	0	0	1	1	0	0	0	0	0	0	0	0	0	0	0	0	0	0	0	6200	5300	900	8.97	29.6
149	224147	1	50	26	0	1	1	0	0	0	4	14	0	1	0	1	1	1	1	13	0	1	1	0	0	0	0	0	0	0	0	0	0	0	0	0	0	0	0	0	0	0	0	0	3400	2700	700	8.82	29.1
150	208558	1	33	15	1	1	0	0	1	0	1	8	0	1	1	1	0	1	1	15	0	1	1	0	0	0	0	1	1	0	0	0	0	0	0	0	0	1	0	0	0	0	0	0	4700	3900	800	7.91	26.1
151	196520	1	37	22	1	2	1	0	0	0	2	9	0	1	1	1	0	0	1	15	0	0	0	0	0	0	0	0	0	0	0	0	0	0	0	0	0	0	0	0	0	0	0	0	5100	3100	2000	7.88	26
152	224418	1	40	20	0	3	1	1	0	0	3	15	0	1	1	1	0	0	1	15	0	0	0	0	0	0	0	0	0	0	0	0	0	0	0	0	0	0	0	0	0	0	0	0	4100	3700	400	7.3	24.1
153	224834	1	28	20	0	3	1	1	1	0	3	10	0	1	0	1	0	0	1	15	0	0	0	0	0	0	0	0	0	0	0	0	0	0	0	0	0	0	0	0	0	0	0	0	7100	5600	1500	8.18	27
154	225132	1	45	21	1	1	1	1	0	0	1	9	0	1	1	1	0	0	1	15	0	0	0	0	0	0	0	0	0	0	0	0	0	0	0	0	0	0	0	0	0	0	0	0	2100	1600	500	9.45	31.2
155	226397	1	34	22	1	3	1	1	0	0	3	6	0	1	1	1	0	0	0	15	1	0	0	1	1	1	1	1	1	0	0	0	0	0	1	0	0	1	0	0	0	0	0	0	3900	2100	1800	12.61	41.6
156	226551	1	34	16	0	1	1	1	0	0	3	9	0	1	1	1	0	1	1	15	1	1	0	1	1	0	1	1	1	0	0	0	0	0	0	0	0	0	0	0	0	0	0	0	3200	3100	100	7.48	24.7
157	227665	0	45	23	1	1	0	0	0	0	2	11	0	1	0	0	0	0	0	15	1	0	0	0	0	0	0	0	0	0	0	0	0	0	0	0	0	0	0	0	0	0	0	0	5500	3900	1600	6.21	20.5
158	227764	1	35	23	0	2	1	1	0	0	1	8	0	1	1	1	0	1	0	15	0	0	0	0	0	0	0	0	0	0	0	0	0	0	0	0	0	0	0	0	0	0	0	0	10300	8600	1700	7.61	25.1
159	228065	2	36	28	0	3	1	1	0	0	0	7	0	0	0	1	0	0	0	15	0	0	0	0	0	0	0	0	0	0	0	0	0	0	0	0	0	0	0	0	0	0	0	0	15700	14900	800	9.3	30.7
160	218866	1	28	15	0	2	1	1	0	0	1	11	0	1	0	0	0	1	1	15	0	1	0	1	0	0	0	1	0	0	0	0	0	0	0	0	1	0	0	0	0	0	0	0	8900	7700	1200	9.03	29.8
161	228550	1	65	16	1	1	1	1	1	0	2	15	0	1	0	1	0	0	1	15	0	1	1	1	1	0	1	1	1	0	0	0	0	0	0	0	0	0	0	0	0	0	0	0	6000	5500	500	10.58	34.9
162	227011	1	39	21	0	3	1	1	1	0	1	10	0	1	1	1	0	0	0	15	0	0	0	0	0	0	0	1	0	0	0	0	0	0	0	0	0	0	0	0	0	0	0	0	4400	3500	900	8.33	27.5
163	226948	1	30	15	0	2	0	0	0	0	0	7	0	1	0	0	0	0	0	15	1	0	0	0	0	0	0	0	0	0	0	0	0	0	0	0	0	0	0	0	0	0	0	0	5200	3400	1800	13.3	43.9
164	231043	1	24	31	1	1	0	0	0	0	3	7	0	1	1	1	0	0	0	15	0	0	0	0	0	0	0	1	0	0	0	0	0	0	0	0	0	0	0	0	0	0	0	0	2300	2200	100	11.82	39
165	229630	1	33	16	1	3	0	1	0	0	3	9	0	1	1	1	0	1	1	15	0	0	0	1	1	1	1	0	0	0	0	0	0	0	0	0	0	0	0	0	0	0	0	0	2000	1900	100	10.42	34.4
166	232129	0	46	12	1	1	0	1	0	0	2	15	0	1	0	1	0	0	1	15	0	1	1	1	0	0	0	0	0	0	0	0	0	0	0	0	0	0	0	0	0	0	0	0	8600	7300	1300	5.64	18.6
167	217991	1	35	21	0	3	0	0	0	0	1	10	0	1	0	0	0	1	1	15	0	1	1	0	0	0	0	0	0	0	0	0	0	0	0	0	0	0	0	0	0	0	0	0	6500	4500	2000	13.7	45.2
168	227357	1	33	16	0	2	1	1	1	0	3	14	0	1	1	1	0	1	1	15	0	1	1	1	0	0	1	1	1	0	0	0	0	0	0	0	1	0	0	0	0	0	0	0	2100	900	1200	5.45	18
169	223885	0	29	15	1	1	0	0	0	0	3	7	0	1	1	1	1	0	1	15	0	1	1	1	0	0	0	1	1	0	0	0	0	0	1	0	0	1	0	0	0	1	0	0	6400	5500	900	9.18	30.3
170	204841	0	40	17	0	1	0	0	0	0	2	6	0	1	1	1	1	1	1	15	0	1	1	1	1	1	1	1	1	0	0	0	0	0	0	0	0	1	0	0	0	0	0	0	6600	6000	600	10.24	33.8
171	223136	1	23	14	0	3	0	0	0	0	3	8	0	1	0	0	0	1	1	15	0	0	0	0	0	0	0	1	1	0	0	0	0	0	0	0	1	1	0	0	0	0	0	0	4500	3100	1400	6.73	22.2
172	222437	1	49	22	1	1	1	1	0	0	2	14	0	1	1	1	1	1	1	15	1	1	1	1	1	0	0	0	0	0	0	0	0	0	0	0	0	0	0	0	0	0	0	0	8000	7200	800	9.39	31
173	217470	1	39	17	1	3	0	0	0	0	2	8	0	1	1	1	0	0	1	15	0	0	1	0	0	0	0	0	0	0	0	0	0	0	0	0	0	0	0	0	0	0	1	0	12000	11500	500	12.67	41.8
174	218514	1	46	25	1	3	0	0	0	0	2	10	0	1	1	1	0	0	1	15	0	0	0	0	0	0	0	0	0	0	0	0	0	0	0	0	0	1	0	0	0	0	0	0	7300	5500	1800	11.06	36.5
175	216649	1	42	23.5	1	3	0	0	0	0	3	9	0	1	1	1	0	0	0	15	0	0	0	0	0	0	0	0	0	0	0	0	0	0	0	0	0	0	0	0	0	0	0	0	6700	4100	2600	15.61	51.5
176	219409	1	35	21.3	0	2	0	0	1	0	3	5	0	1	1	1	0	0	1	15	1	0	0	0	0	0	0	0	1	0	1	0	0	0	0	0	0	0	0	0	0	0	0	0	4000	3000	1000	10	33
177	205895	0	47	13.74	1	1	0	0	0	0	1	9	0	0	0	0	1	1	1	15	0	0	0	0	0	0	0	0	1	0	0	0	0	0	0	0	0	0	0	0	0	0	0	0	5000	3500	1500	8.79	29
178	218333	1	35	20	1	3	1	1	1	0	2	13	0	1	0	1	0	1	1	15	1	0	0	0	0	0	0	0	0	0	0	0	0	0	0	0	0	0	0	0	0	0	0	0	3800	3710	90	8.27	27.3
179	219673	1	30	16	1	3	0	0	0	0	1	7	0	1	0	0	0	0	1	15	1	1	0	0	0	0	0	1	0	0	0	0	0	0	0	0	0	0	0	0	0	0	1	0	6600	5520	1080	10.27	33.9
180	219409	1	35	18.5	0	1	1	1	1	0	2	11	0	1	1	1	0	1	1	15	1	0	0	0	0	0	0	1	1	1	0	0	0	0	0	0	0	0	0	0	0	0	0	0	6800	4800	2000	10.45	34.5
181	211835	1	50	24	0	3	0	1	0	0	2	8	0	1	0	0	0	0	0	15	1	0	0	0	0	0	0	0	0	0	0	0	0	0	0	0	0	0	0	0	0	0	0	0	7800	5900	1900	9.85	32.5
182	206388	1	49	23	0	3	1	1	1	0	3	13	0	1	0	0	1	1	0	15	0	1	0	1	0	0	0	1	1	0	0	0	0	0	0	0	0	1	0	0	0	0	1	0	2400	1700	700	7.09	23.4
183	198770	0	54	24	0	3	0	0	0	0	4	8	0	1	1	1	0	0	1	15	0	1	1	0	0	0	0	1	1	0	0	0	0	0	0	0	0	1	0	0	0	0	0	1	4300	3100	1200	11.55	38.1
184	204961	1	24	16	0	1	1	0	0	0	6	14	0	1	1	1	0	1	1	15	0	1	1	1	1	1	0	1	1	0	0	1	0	0	0	0	1	0	0	0	0	0	0	0	5400	3300	2100	9.21	30.4
185	221546	1	27	19	1	1	0	1	0	0	5	16	0	1	1	0	0	1	1									1	1	0	0	0	0	0	0	0	0	1	0	0	0	0	0	0	8200	7500	700	6.52	21.5
186	221431	1	38	21	0	3	1	1	0	0	1	6	0	1	0	0	0	0	1					1	1	1	1	0	0	0	0	0	0	0	0	0	0	0	0	0	0	0	0	0	4300	3500	800	10.42	34.4
187	188296	1	28	23	1	3	1	1	0	0	3	10	0	1	0	0	0	0	1		1			0	0	0	0	0	0	0	0	0	0	0	0	0	0	0	0	0	0	0	0	0	5000	4500	500	8.18	27
188	201150	1	35	18	1	1	1	1	0	0	1	10	0	1	0	0	0	0	1	15	1	0	0	0	0	0	0	1	0	0	0	0	0	0	0	0	1	0	0	0	0	0	0	0	2900	2170	730	8.3	27.4
189	200892	1	58	19	0	2	1	1	0	0	2	10	0	1	0	0	0	1	1	15	0	0	0	0	0	0	0	1	1	0	0	0	0	0	0	0	0	0	0	0	0	0	0	0	4300	3700	600	11.03	36.4
190	196709	1	38	20	0	3	0	0	0	0	5	20	0	1	0	1	0	0	1	15	0	0	0	0	0	0	0	0	0	0	0	0	0	0	0	0	0	0	0	0	0	0	0	0	8000	6820	1180	8.48	28
191	196376	1	32	19	0	3	1	1	1	0	3	12	0	1	1	1	0	0	1	15	1	1	0	0	0	0	0	0	0	0	0	0	0	0	0	0	0	0	0	0	0	0	0	0	9900	8000	1900	10.36	34.2
192	219485	0	40	21	0	2	1	1	0	0	4	10	0	1	1	1	0	0	1	15	0	0	0	1	1	1	1	0	0	0	0	0	0	0	0	0	0	0	0	0	0	0	0	0	2300	2200	100	5.45	18
193	232155	1	26	18	0	3	1	1	0	0	1	7	0	1	0	1	0	0	1	15	0	0	0	1	1	1	1	1	0	0	0	0	0	0	0	0	0	0	0	0	0	0	0	0	2600	2100	500	6.52	21.5
194	196688	1	33	17	0	3	1	1	0	0	0	9	0	1	1	1	0	0	1	15	0	0	0	0	0	0	0	1	0	0	0	0	0	0	0	0	0	1	0	0	0	0	0	0	3800	2470	1330	8.73	28.8
195	230310	0	31	17	1	2	1	1	1	0	1	9	0	1	0	1	0	1	1	15	0	1	1	1	0	0	0	0	0	0	0	0	0	0	0	0	0	0	0	0	0	0	0	0	7000	6400	600	7.36	24.3
[truncated: 45 more columns]

## Sheet: Variables
num	Number
record	Record
gender	Gender	0 = cis gender female	1 = cisgender male	2 = transgender female
age	Age
bmi	Body Mass Index
previous_art	Use of previous ART	0 = no	1 = yes
sexual_pref	Sexual preferences	1 = Bisexual	2 = Heterosexual	3 = Homosexual
alcohol_comp	Etilism	0 = no	1 = yes
tabaquism	Tabaquism	0 = no	1 = yes
drugs	Drug use	0 = no	1 = yes
dm	Diabetes mellitus	0 = no	1 = yes
sofa	SOFA
apache	APACHE II
hepathopathy	Hepathopathy	0 = no	1 = yes
fever	Fever	0 = no	1 = yes
dispnoea	Dispnoea	0 = no	1 = yes
cough	Cough	0 = no	1 = yes
headache	Headache	0 = no	1 = yes
diarrhea	Diarrhea	0 = no	1 = yes
weight_loss_10kg	More than 10kg weight loss	0 = no	1 = yes
glasgow	Glasgow coma scale
adenopathies	Adenopathies	0 = no	1 = yes
hepatomeg	Hepatomegaly	0 = no	1 = yes
esplenomeg	Esplenomegaly	0 = no	1 = yes
severe_sepsis	Severe sepsis	0 = no	1 = yes
shock	Shock	0 = no	1 = yes
severe_resp_insf	Severe respiratory insuficiency	0 = no	1 = yes
mods	Multiple Organ Damage Syndrome	0 = no	1 = yes
multiple_od	Multiple opportunistic diseases	0 = no	1 = yes
candida	Candida	0 = no	1 = yes
cocci	Coccidioides	0 = no	1 = yes
crypto	Cyrptococcus	0 = no	1 = yes
criptospor	Cryptosporidium	0 = no	1 = yes
hiv_encefalop	HIV encephalpathy	0 = no	1 = yes
herpes_simplex	Herpes simplex	0 = no	1 = yes
histo	Histoplasma	0 = no	1 = yes
isos	Isospora	0 = no	1 = yes
ks	Kaposi sarcoma	0 = no	1 = yes
pcp	Pneumocystis jirovecii	0 = no	1 = yes
pml	Progressive multifoca leukoence…	0 = no	1 = yes
salmonella	Salmonella	0 = no	1 = yes
toxo	Toxoplasma	0 = no	1 = yes
anal_cancer	Anal Cancer	0 = no	1 = yes
hbv	Hepatitis B virus	0 = no	1 = yes
hcv	Hepatitis C virus	0 = no	1 = yes
leu	Leukocytes
neu	Neutrophils
lin	Lymphocytes
hb	Hemoglobin
hto	Hematocrit
plaq	Platelets
glu	Glucose
cr	Creatinin
na	Sodium
k	Potassium
alb	Albumin
bt	Total bilirrubin
bd	Direct bilirrubin
tgo	Glutamic oxaloacetic transaminase
tgp	Glutamic Pyruvic Transaminase
ldh	Lactate dehidrogenase
ap	alkaline phosphatase
micro_dx	Microbiologic diagnosis	0 = no	1 = yes
d_labs	Laboratories date
smear	Smear	0 = Negative	1 = Positive
culture	Culture	1 = Non-tuberculous mycobacteria	2 = Multidrug resistant mycobacterium tuberculosis	3 = Monoresistant mycobacterium tuberculosis	4 = Pansensible mycobacterium tubreculosis	5 = Extensively drug-resistant mycobacterium tuberculosis	6 = No growth
culture_sample	Culture sample	1 = Abscess	2 = Sputum	3 = Lymph node	4 = Blood	5 = BAL	6 = CSF	7 =Bone marrow	8 = Urine	9 = Other	10 = Lung
genexpert	GeneXpert	0 = no	1 = yes
rifa_gene	Resistance to rifampicin	0 = no	1 = yes
tb_site	Tuberculosis disemination	1 = Diseminated	2 = Extrapulmonar	3 = Pulmonar
extrapul_form	Tb extrapulmonary form	1 = Articular	2 = Ganglionar	3 = Gastrointestinal	4 = Bone	5 = Pericardic	6 = Pleural	7 = Renal	8 = CNS
mycobacteri_species	Mycobacteria species	1 = M. tuberculosis	2 = M. avium	3 = M. simiae	4 = Not identified	5 = Not isolated
hiv_vl	HIV viral load
hiv_vl_log	HIV viral load logarithm
cd4	CD4
cd4_p	CD4 %
3m_hiv_vl	HIV viral load at 3 months
3m_hiv_vl_log2	HIV viral load logarithm at 3 months
3m_cd4	CD4 at 3 months
3m_cd4_p	CD4 % at 3 months
hosp_days	Total hospital stay
discharge	Discharge	0 = Clinical improvement	1 = Death	2 = Voluntary discharge
iris	IRIS	0 = no	1 = yes
iris_type	IRIS type	1 = Unsmasked	2 = Paradoxical
viral_failure	Viral failure	0 = no	1 = yes
immune_failure	Immune failure	0 = no	1 = yes
disease_resol	Disease resolution	0 = no	1 = yes
therapy_failure	Failure to treatment	0 = no	1 = yes
relapse	Disease relapse	0 = no	1 = yes
death	Death	0 = no	1 = yes
death_tb	Death caused by mycobacteria
follow_loss	Loss of follow-up	0 = no	1 = yes
follow_time	Follow-up time
last_visit	Last visit
group	Group	0 = CMV negative	1 = CMV positive
